# Supplementary material for: Oral Health Status and Patterns of Dental Service Utilization of Adolescents in Lesotho, Southern Africa
Source: MDPI journal article supplement (doi:10.3390/children8020120), 2021-02-07
Supplement: s1 [file s1]

## Attachment 1: Survey Questionnaire: Oral health care needs of adolescents in the Kingdom of Lesotho

Please take a few minutes to fill out this survey on your oral health status and practices. **Your answers and all the shared information will be kept confidential.** We also welcome your feedback and comments. Thank you for your time and participation.

### Section A: General Information

1. The patient is an: ☐ Adult ☐ Child

2. Name of Guardian (if applicable):

\_\_\_\_\_

3. Personal Information

|                        |       |          |             |
|------------------------|-------|----------|-------------|
| Number by school:      | _____ | Gender   | Age         |
| School Mailing Address | City  | District | Postal Code |
| Email                  | Phone |          |             |

4. Where do you live (Name of village): \_\_\_\_\_

### Section B: General Health

The following section includes questions about your general health. This will help us analyze any potential relationship of your self-reported general health to your self-perceived dental health. From the following questions, please select the answer that best represents your current situation:

5. In general, how would you rate your quality of life? (Please choose one)

☐ Excellent ☐ Very good ☐ Good ☐ Fair ☐ Poor

6. In general, how would you rate your general health? (Please choose one)

☐ Excellent ☐ Very good ☐ Good ☐ Fair ☐ Poor

7. Do you have a regular medical doctor?

☐ Yes ☐ No

8. Have you experienced any medical condition?

☐ Yes ☐ No

If yes, please name the illness: \_\_\_\_\_

9. Are you currently on any medications?

☐ Yes ☐ No

If yes, please provide the names of your past and present medications:

### Section C: Oral Health

The following section includes questions about your oral health. This will help us identify the self-reported dental health status, common self-perceived dental conditions, self-reported treatment needs and frequency of dental visit. From the following questions, please select the answer that best represents your current situation:

10. How would you rank the dental health of your family? (Please choose one)

☐ Excellent ☐ Very good ☐ Good ☐ Fair ☐ Poor

11. In general, how would you rate the health in your mouth? (Please choose one)

☐ Excellent ☐ Very good ☐ Good ☐ Fair ☐ Poor

12. How important do you think the health of your mouth is? (Please choose one)

☐ Very important ☐ somewhat important ☐ Not important  
☐ Not at all important ☐ I don't know

13. How important do you consider dental health to be for your family?

☐ Very important ☐ somewhat important ☐ Not important  
☐ Not at all important ☐ I don't know

14. How often do you brush your teeth?

☐ Never ☐ In the morning ☐ before bed  
☐ Twice day (includes and morning before bed) ☐ Every time I eat

15. How often do you and children in your household brush your teeth?

☐ Never ☐ In the morning ☐ Before bed  
☐ Twice day (includes and morning before bed) ☐ Every time I eat

16. Among children in your household, what method is largely used to clean teeth?

☐ Brush/paste ☐ Dental floss ☐ Water only ☐ Traditional instrument ☐ Other

17. Does your water supply contain fluoride?

☐ Yes ☐ No ☐ Do not know

18. Have you or any family experienced any form of dental health education?

☐ Yes ☐ No

19. If so where/when? \_\_\_\_\_

20. Where do family members go for dental health problems?  
☐ Nowhere    ☐ Dentist    ☐ Nearby clinic    ☐ Hospital    ☐ Other

21. How many kilometers is the closest dental care facility? \_\_\_\_\_

22. Do you have a regular dentist?  
☐ Yes    ☐ No

23. If you went to a dentist for treatment tomorrow, how would you feel?<sup>1</sup>  
☐ Not anxious    ☐ Slightly anxious    ☐ Fairly anxious    ☐ Very anxious

24. When was the last time you saw a dental professional (dentist or dental hygienist)?  
(Please choose one)  
☐ Less than 1 year ago    ☐ 1 year to less than 2 years ago  
☐ 2 years to less than 3 years ago    ☐ 3 years to less than 4 years ago  
☐ 4 years to less than 5 years ago    ☐ 5 or more years ago  
☐ Never

25. When was the last time an adult in the family last saw a dental professional (dentist or dental hygienist)? (Please choose one)  
☐ Less than 1 year ago    ☐ 1 year to less than 2 years ago  
☐ 2 years to less than 3 years ago    ☐ 3 years to less than 4 years ago  
☐ 4 years to less than 5 years ago    ☐ 5 or more years ago  
☐ Never

26. How often do you see a dental professional (dentist or dental hygienist)? (Please choose one).  
☐ More than once a year for checkups or treatments    ☐ Less than once a year for checkup or treatment  
☐ About once a year for checkup or treatment    ☐ Only for emergency care    ☐ Never

27. Have you ever felt discriminated against by a dental professional because of your condition? (If applicable)  
☐ Yes    ☐ No    Comments

28. Have you or anyone in your family experienced any difficulty in accessing dental healthcare when needed?  
☐ Yes    ☐ No

\_\_\_\_\_

If your answer is no, what were the reasons

- ☐ Dentist unwilling to provide care ☐ financial cost ☐ too far/transportation problem  
☐ Afraid of dentist ☐ Not a priority ☐ other

29. In the past 12 months, have you avoided having some or all the dental treatment that was recommended because of the cost

- ☐ Yes, because I could not afford the cost of treatment ☐ No ☐ Other

30. Do you presently experience one or more of the following conditions. (You may choose more than one answer)

- |                                                                                         |                                                                         |
|-----------------------------------------------------------------------------------------|-------------------------------------------------------------------------|
| <input type="checkbox"/> Toothache                                                      | <input type="checkbox"/> Excessive bleeding gums                        |
| <input type="checkbox"/> Sensitivity in your teeth when consuming something hot or cold | <input type="checkbox"/> Loosening of teeth                             |
| <input type="checkbox"/> Pain around your jaw joints                                    | <input type="checkbox"/> Swelling around neck                           |
| <input type="checkbox"/> Bleeding gums while brushing your teeth                        | <input type="checkbox"/> Severe mouth pain at night                     |
| <input type="checkbox"/> Persistent dry mouth                                           | <input type="checkbox"/> Severe tooth pain at night                     |
| <input type="checkbox"/> Persistent bad breath                                          | <input type="checkbox"/> I have pains in my jaw(s)                      |
| <input type="checkbox"/> White patch on your tongue                                     | <input type="checkbox"/> I am not happy with the appearance of my teeth |
| <input type="checkbox"/> Hole in teeth (decay)                                          | <input type="checkbox"/> Other                                          |
| <input type="checkbox"/> Persistent ulcers                                              |                                                                         |

31. Do you think you have any untreated condition(s) in your mouth?

- ☐ Yes ☐ No ☐ I don't know

Comments

---

32. If yes, then what management of these untreated conditions do you think you need?  
(You may choose more than one answer)

- ☐ I need cleaning  
☐ I need filing(s)  
☐ I need root canal treatment  
☐ I need orthodontic (braces) treatment  
☐ I need partial denture  
☐ I need full denture  
☐ I need implant, bridge or crown  
☐ I don't know  
☐ Other

33. Are you aware of the effects of bad oral hygiene?  
☐ Yes | ☐ No

34. What is the prime reason for lack of dental care? (Select all that apply)  
☐ Too Expensive    ☐ Too far    ☐ Not enough dentists    ☐ Awareness    ☐ Quality of care    ☐ Other

35. How willing are you to travel for dental treatment?  
☒ Up to 10km    ☐ 10 km - 20km    ☐ To Maseru city

36. How often would you visit a dentist?  
☐ Once a year    ☐ Twice a year  
☐ As required by dentist

37. On an average how much have you paid for a dental visit?  
\_\_\_\_\_

38. How much are you willing to pay for a dental visit?  
☐ 50 LSL -75 LSL    ☐ 75 LSL – 100 LSL    ☐ 100 LSL – 200 LSL

39. Have you been recommended dental treatment in the last 2 years?  
☐ Yes | ☐ No | ☐ Don't know

40. Any additional feedback or concerns.

---

---

---

---

Thank you for taking the time to fill out our survey. Your participation is greatly appreciated.
